# Supplementary material
Source: PubMed Central journal article supplement (PMC4691352)
Supplement: NIHMS744517-supplement-Appendix.pdf [file NIHMS744517-supplement-Appendix.pdf]

**Table 1. Summary of definitions and outputs from four HIV continuums of care which used data from the USA, Canada, Denmark, and France.**

| Author, Country, Journal, Year                                           | Data Source                                                                                                                   | Data Presented                    | Estimated HIV-Infected population                                                                                                     | Diagnosed                                                                                                                                                                                                                                                            | Linked                                                                                                                                                                                                                                                                                 | Retained                                                                                                                                                                                                                                                   | ART Indicated                                                                                                                                                           | On ART                                                                                                                             | ART Adherence                                                                                                                                                                                      | Virologic Suppression                                                                                                                                                                                                               |
|--------------------------------------------------------------------------|-------------------------------------------------------------------------------------------------------------------------------|-----------------------------------|---------------------------------------------------------------------------------------------------------------------------------------|----------------------------------------------------------------------------------------------------------------------------------------------------------------------------------------------------------------------------------------------------------------------|----------------------------------------------------------------------------------------------------------------------------------------------------------------------------------------------------------------------------------------------------------------------------------------|------------------------------------------------------------------------------------------------------------------------------------------------------------------------------------------------------------------------------------------------------------|-------------------------------------------------------------------------------------------------------------------------------------------------------------------------|------------------------------------------------------------------------------------------------------------------------------------|----------------------------------------------------------------------------------------------------------------------------------------------------------------------------------------------------|-------------------------------------------------------------------------------------------------------------------------------------------------------------------------------------------------------------------------------------|
| Hall et al. JAMA Intern Med. 2013                                        | National HIV Surveillance System (NHSS)<br>Behavioural Risk Factor Surveillance System<br>Medical Monitoring Project database | Continuum for USA in 2009.        | NHSS data was used to estimate the HIV infected population.<br><b>1, 148, 200 (100%) estimated HIV-infected population in 2009.</b>   | The number of HIV diagnoses was obtained from the NHSS.<br><b>82% of infected individuals were diagnosed.</b>                                                                                                                                                        | Having ≥1 CD4 or VL test result within three months after diagnosis.<br><b>66% of infected individuals were linked to HIV care.</b>                                                                                                                                                    | Having ≥1 medical care visit between January and April 2009.<br><b>37% of infected individuals were retained in care.</b>                                                                                                                                  | Not included in the continuum.                                                                                                                                          | Medical record documentation of any ART prescription in the past 12 months.<br><b>33% of infected individuals were on ART.</b>     | Not included in the continuum.                                                                                                                                                                     | Medical record documentation of the most recent VL as ≤200 copies/mL.<br><b>25% of infected individuals achieved viral suppression.</b>                                                                                             |
| Nosyk et al., British Columbia, Canada, Lancet Infectious Diseases, 2014 | Linked-population level database                                                                                              | Longitudinal data from 1996-2011. | HIV prevalence estimates from Public Health Agency of Canada.<br><br><b>11, 700 (100%) estimated HIV-infected population in 2011.</b> | The first instance of any one of:<br>• a confirmed HIV-positive test<br>• detectable VL†<br>• an HIV-related MSP billing or hospital admission<br>• a reported AIDS-defining illness<br>• ARV dispensation<br><br><b>71% of infected individuals were diagnosed.</b> | The first instance of an HIV-related service‡ following HIV diagnosis:<br>(i) Among those with a confirmed HIV test; (ii) Among those without a confirmed HIV test: ≥ 30 days following the derived HIV diagnosis date.<br><br><b>67% of infected individuals were linked to care.</b> | (i) HIV-related physician visits OR diagnostic tests (CD4 or VL) ≥3 months apart within the calendar year OR<br>(ii) >2 ART drug dispensations ≥3 months apart, within the calendar year.<br><br><b>57% of infected individuals were retained in care.</b> | Defined as meeting the primary or secondary IAS-USA initiation criteria within the calendar year in 2011.<br><br><b>53% of infected individuals were ART indicated.</b> | Having >2 ARV drug dispensations ≥3 months apart, within the calendar year.<br><br><b>51% of infected individuals were on ART.</b> | Having >80% adherence in the calendar year, or from the point of ARV initiation for those beginning therapy within the calendar year.<br><br><b>44% of infected individuals were ART adherent.</b> | Among individuals adherent to therapy, defined as having no detectable pVL <sup>3</sup> over a period ≥3 months in duration within the calendar year.<br><br><b>35% of infected individuals achieved viral suppression in 2011.</b> |

| Author, Country, Journal, Year                    | Data Source                                                                                                                                                  | Data Presented                 | Estimated HIV-Infected population                                                                                                                 | Diagnosed                                                                                                                                                                                                                                                                                                                             | Linked                                                                                                                                                                                                                                                                           | Retained                                                                                                                                                                                        | ART Indicated                         | On ART                                                                                    | ART Adherence                  | Virologic Suppression                                                                                             |
|---------------------------------------------------|--------------------------------------------------------------------------------------------------------------------------------------------------------------|--------------------------------|---------------------------------------------------------------------------------------------------------------------------------------------------|---------------------------------------------------------------------------------------------------------------------------------------------------------------------------------------------------------------------------------------------------------------------------------------------------------------------------------------|----------------------------------------------------------------------------------------------------------------------------------------------------------------------------------------------------------------------------------------------------------------------------------|-------------------------------------------------------------------------------------------------------------------------------------------------------------------------------------------------|---------------------------------------|-------------------------------------------------------------------------------------------|--------------------------------|-------------------------------------------------------------------------------------------------------------------|
| Helleberg et al. Sweden and Denmark PlosOne, 2013 | Swedish-Danish HIV Cohort (a population-based nationwide cohort study of all HIV-infected individuals who have been treated at Danish HIV centres) database. | Continuum for Denmark in 2010. | Not included in the continuum.                                                                                                                    | HIV diagnoses were obtained from the annual national HIV surveillance reports 1995-2010.<br><br><i>100% of diagnosed individuals in 2010.</i>                                                                                                                                                                                         | The number of individuals enrolled in the Danish HIV Cohort Study diagnosed from 1995 to 2010.<br><br><i>95% of diagnosed individuals were linked to care.</i>                                                                                                                   | Having either visited an HIV care center and/or having a VL or CD4 count within 13 months before July 1 <sup>st</sup> , 2010.<br><br><i>88% of diagnosed individuals were retained in care.</i> | Not included in the continuum.        | The number on ART.<br><br><i>73% of diagnosed individuals were on ART.</i>                | Not included in the continuum. | VL <500 copies/mL at the last measurement.<br><br><i>70% of diagnosed individuals achieved viral suppression.</i> |
| Supervie et al., France, CROI 2013                | The French health insurance scheme; The FHDH-ANRS-CO4 cohort (which is representative of HIV patients in care in France).                                    | Continuum for France in 2010.  | Estimated infected population back-calculated from HIV surveillance data.<br><br><i>149,900 (100%) estimated HIV-infected population in 2010.</i> | HIV-infected individuals in care: data from the French health insurance scheme on the number of individuals having long-term disease agreement for HIV; all HIV-infected individuals newly enrolled in care in France are eligible for long-term disease agreement for HIV.<br><br><i>81% of infected individuals were diagnosed.</i> | -The authors only showed “in care” and did not differentiate between linked and retained.<br>-Defined as all individuals enrolled in the French health insurance scheme as having long-term disease agreement for HIV.<br><br><i>74% of infected individuals were “in care”.</i> |                                                                                                                                                                                                 | <i>Not included in the continuum.</i> | On cART for greater than 6 months.<br><br><i>60% of infected individuals were on ART.</i> | Not included in the continuum. | VL <50 copies/mL.<br><br><i>52% of infected individuals achieved viral suppression.</i>                           |

MSP=medical services plan. ART=highly active antiretroviral therapy. IAS=International AIDS Society. VL=plasma viral load \*Unpublished data (Archibald C, Public Health Agency of Canada, personal communication). †Based on plasma viral load testing technology available at the time of measurement; virological suppression thresholds: <500 copies per mL for 1996, <400 copies per mL for 1997-98, and <50 copies per mL for 1999-2011. ‡Plasma viral load test, CD4 cell count, HIV-related physician visit, or antiretroviral drugs dispensed. §Refers to the number of days of drugs dispensed, divided by the total number of days in care.
